# Supplementary material for: A novel electrochemical sensing method based on an amino-functionalized MXene for the rapid and selective detection of Hg2+
Source: Royal Society of Chemistry journal article supplement (doi:10.1039/d3ay01652h), 2023-12-18
Supplement: d3ay01652h1.pdf [file d3ay01652h1.pdf]

## Supporting Information

### **A novel electrochemical sensing based on amino-functionalized MXene for the rapid and selective detection of Hg<sup>2+</sup>**

Jinquan Liu <sup>a,b,c</sup>, Jiao Shi <sup>a,b,c</sup>, Miao Zhong <sup>a,b,c</sup>, Yating Wang <sup>a,b,c</sup>, Xinxin Zhang <sup>a,b,c</sup>,  
Wenyu Wang <sup>a,b,c</sup>, Zhijun Chen <sup>a,b,c</sup>, Yan Tan <sup>a,b,c</sup>, Dongyun Xu <sup>d</sup>, Shengyuan Yang <sup>a,b,c\*</sup>  
and Le Li <sup>a,b,c\*</sup>

<sup>a</sup> *Department of Health Inspection and Quarantine, School of Public Health, Hengyang Medical School, University of South China, Hengyang, Hunan, 421001, People's Republic of China.*

<sup>b</sup> *Hunan Key Laboratory of Typical Environment Pollution and Health Hazards, University of South China, Hengyang 421001, People's Republic of China.*

<sup>c</sup> *Hengyang Key Laboratory for Comprehensive Prevention and Control of Uranium Contamination and its Health Hazards, University of South China, Hengyang 421001. Hunan, People's Republic of China*

<sup>d</sup> *Hengyang Center for Disease Control and Prevention, Hengyang, Hunan, 421001, People's Republic of China.*

*\*Corresponding Author: Shengyuan Yang and Le Li; E-mail addresses: yangshyhy@126.com (Shengyuan Yang) and [usclile@126.com](mailto:usclile@126.com) (Le Li)*

### Fluorescamine validation $\text{NH}_2\text{-Ti}_3\text{C}_2\text{T}_x$

The  $\text{NH}_2\text{-Ti}_3\text{C}_2\text{T}_x$  (5 mg/mL) was dissolved with NaOH (0.02 mol/L) and fluorescamine (0.1 g/L) was dissolved in acetone. Then, 40  $\mu\text{L}$  of  $\text{NH}_2\text{-Ti}_3\text{C}_2\text{T}_x$ , 80  $\mu\text{L}$  of fluorescamine, and 200  $\mu\text{L}$  of PBS (0.01 mol/L) were mixed, and the reaction was carried out for 10 min under protection from light. Fluorescence spectra were recorded by using F-7100 fluorescence spectrophotometer.

### Adsorption experiment

5 mg of  $\text{NH}_2\text{-Ti}_3\text{C}_2\text{T}_x$  was added into the  $\text{Hg}^{2+}$  (115  $\mu\text{mol/L}$ ) solution and shaken for 24 h. Secondly, the supernatant was centrifuged and filtered through a 0.22  $\mu\text{m}$  filter. Then the atomic fluorescence was used to detect the  $\text{Hg}^{2+}$  concentration after adsorption. In order to better demonstrate its adsorption capacity, the concentration of  $\text{Hg}^{2+}$  solution without  $\text{NH}_2\text{-Ti}_3\text{C}_2\text{T}_x$  was also tested under the same conditions.

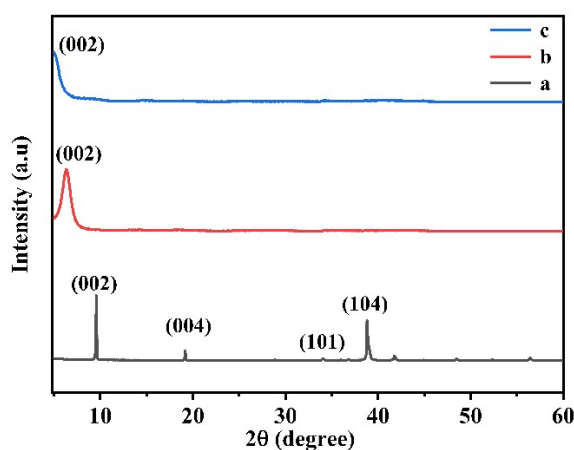

**Fig.S1** XRD spectra of  $\text{Ti}_3\text{AlC}_2$  (a),  $\text{Ti}_3\text{C}_2\text{T}_x$  (b) and  $\text{NH}_2\text{-Ti}_3\text{C}_2\text{T}_x$  (c).

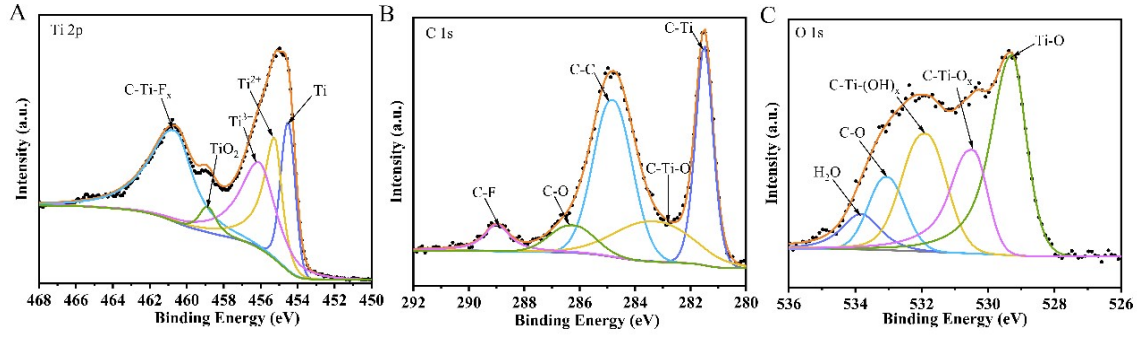

**Fig.S2** High-resolution XPS spectra of Ti 2p (A), C 1s (B), O 1s (C) of  $\text{Ti}_3\text{C}_2\text{T}_x$ .

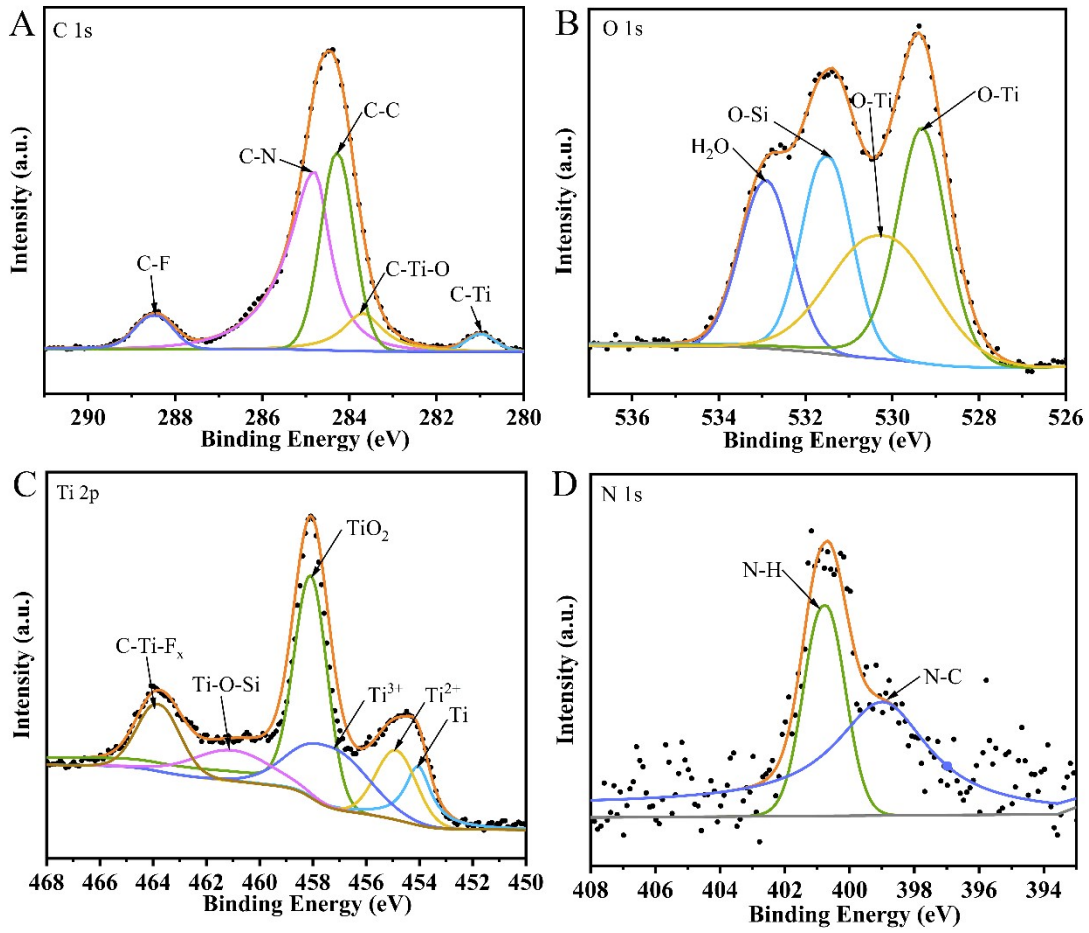

**Fig.S3** High-resolution XPS spectra of C 1s (A), O 1s (B), Ti 2p (C), N 1s(D) of  $\text{NH}_2\text{-Ti}_3\text{C}_2\text{T}_x$ .

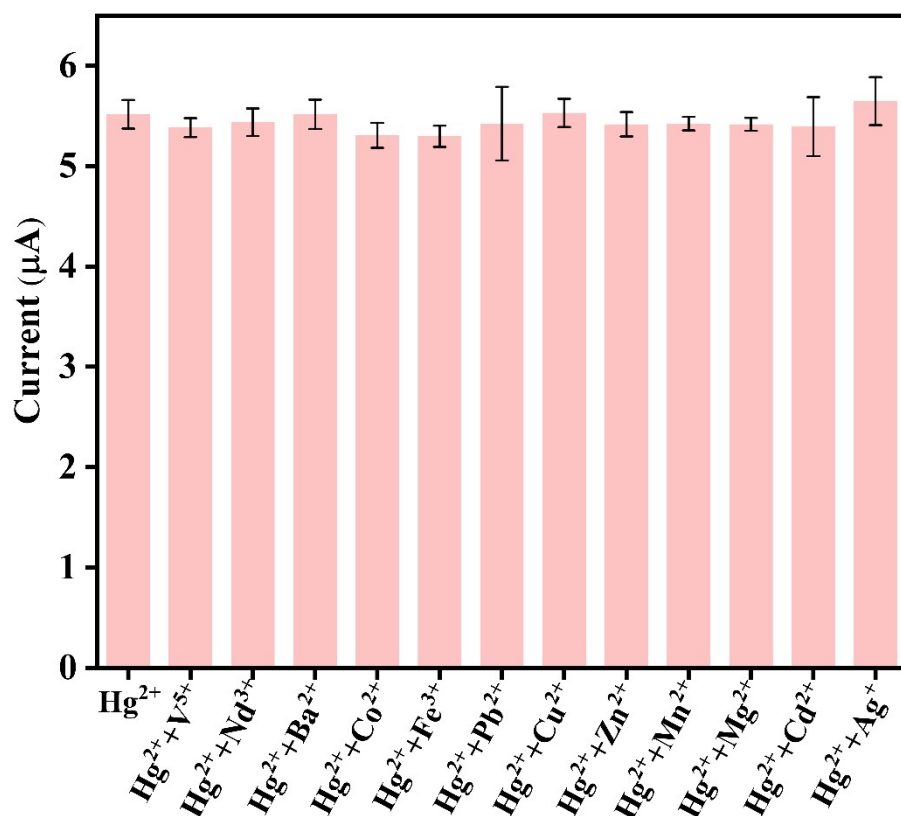

**Fig.S4** The selectivity of propose electrochemical sensing for detection Hg<sup>2+</sup>. All the data were presented three independent measurements (n = 3).

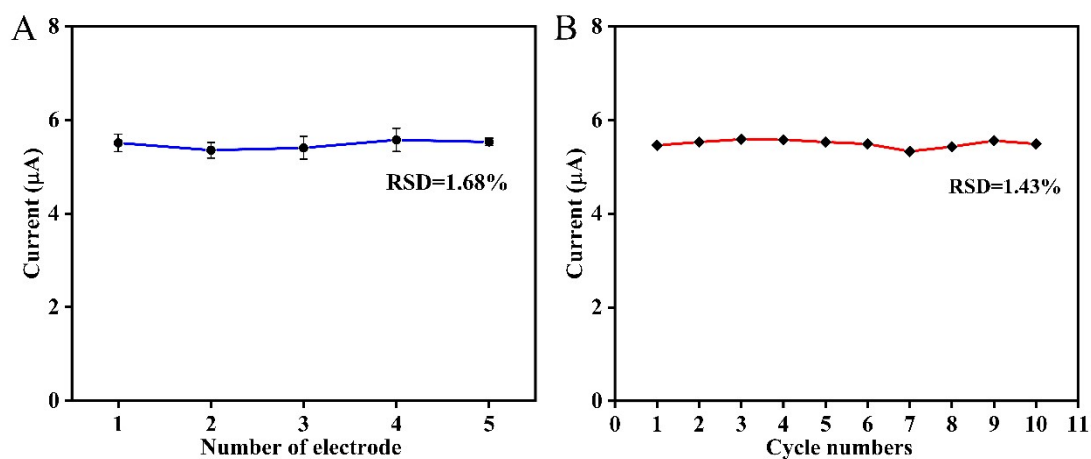

**Fig.S5** (A) The peak current values of 1.0 µmol/L Hg<sup>2+</sup> at five independently NH<sub>2</sub>-Ti<sub>3</sub>C<sub>2</sub>T<sub>x</sub>/GCE; (B) the peak current of 1.0 µmol/L Hg<sup>2+</sup> was detected continuously for ten times under the same condition.

**Table S1** The adsorption experiment AFS detected Hg<sup>2+</sup> results

|                                                | Average ( $\mu\text{mol/L}$ ) | RSD (%) |
|------------------------------------------------|-------------------------------|---------|
| Hg <sup>2+</sup>                               | 116.22                        | 0.64    |
| Hg <sup>2+</sup> +NH <sub>2</sub> <sup>-</sup> | 16.34                         | 3.14    |
| Ti <sub>3</sub> C <sub>2</sub> T <sub>x</sub>  |                               |         |

**Table S2** Comparing different sensor platforms to detect Hg<sup>2+</sup>

| Material                                                       | Detection method | Linear range ( $\mu\text{mol/L}$ ) | LOD ( $\mu\text{mol/L}$ ) | Reference |
|----------------------------------------------------------------|------------------|------------------------------------|---------------------------|-----------|
| Thiazoline-isophorone                                          | Fluorescence     | 0-60                               | 7.22                      | 1         |
| Carbon Quantum Dots                                            | Fluorescence     | 0-50                               | 0.934                     | 2         |
| gallium oxide                                                  | Electrochemical  | 0.3-80                             | 0.13                      | 3         |
| NMO-GR                                                         | Electrochemical  | 0.7-6.7                            | 0.027                     | 4         |
| Silver Nanowires/HPMC/Chitosan/Urease                          | Electrochemical  | 5-25                               | 3.94                      | 5         |
| Alk-Ti <sub>3</sub> C <sub>2</sub> MXene                       | Electrochemical  | 0.1-1.5                            | 0.13                      | 6         |
| NH <sub>2</sub> -Ti <sub>3</sub> C <sub>2</sub> T <sub>x</sub> | Electrochemical  | 0.5-50                             | 0.02                      | This work |

## References

- 1 S. Erdemir, M. Oguz and S. Malkondu, *Anal Chim Acta*, 2022, **1192**, 339353.
- 2 S. Singh and S.K. Kansal, *J Fluoresc*, 2022, **32**, 1143-1154.
- 3 G.A. El-Fatah, H.S. Magar, R.Y.A. Hassan, R. Mahmoud, A.A. Farghali and M.E.M. Hassouna, *Sci Rep*, 2022, **12**, 20181.
- 4 P. Lei, Y. Zhou, S. Zhao, C. Dong and S. Shuang, *J Hazard Mater*, 2022, **435**, 129036.
- 5 A. Saenchoopa, S. Klangphukhiew, R. Somsu, C. Talodthaisong, R. Patramanon, J. Daduang, S. Daduang and S. Kulchat, *Biosensors (Basel)*, 2021, **11**,351.
- 6 X. Zhu, B. Liu, H. Hou, Z. Huang, K.M. Zeinu, L. Huang, X. Yuan, D. Guo, J. Hu and J. Yang, *Electrochimica Acta*, 2017, **248**, 46-57.
